# Supplementary material for: Inhibitory Effect of Lactiplantibacillus plantarum and Lactococcus lactis Autochtonous Strains against Listeria monocytogenes in a Laboratory Cheese Model
Source: MDPI journal article supplement (doi:10.3390/foods11050715), 2022-02-28
Supplement: s1 [file s1]

## SUPPLEMENTARY MATERIAL

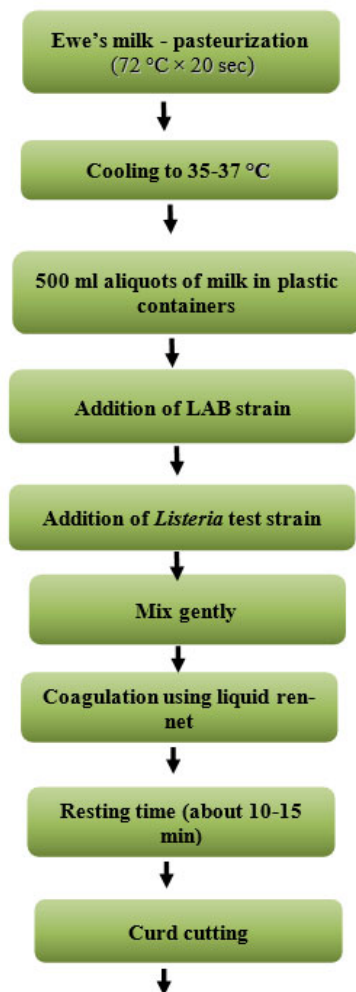

Figure S1. Flow diagram of the cheese manufacturing procedure.

Table S1. -In vitro characteristics related to technological and antimicrobial properties of the microbial strains used in the study.

| Microbial strains       | Isolated from MBDS code # |           | Technological properties                                                                                                  | Antimicrobial properties                                                                                          | Reference                                                                                                         |
|-------------------------|---------------------------|-----------|---------------------------------------------------------------------------------------------------------------------------|-------------------------------------------------------------------------------------------------------------------|-------------------------------------------------------------------------------------------------------------------|
| <i>L. lactis</i> 16FS16 | Sheep cheese              | UNICA B39 | <ul style="list-style-type: none"> <li>6.5% NaCl +</li> <li><i>B</i>-galactosidase +</li> <li>Nisin A producer</li> </ul> | <ul style="list-style-type: none"> <li>Antimicrobial activity</li> <li>Antilisterial activity in vitro</li> </ul> | Cosentino et al., 2012 [37]<br>Pisano et al., 2015 [43]<br>Siroli et al., 2019 [44]<br>Bukvicki et al., 2020 [45] |
| <i>L. lactis</i> 11FS16 | Sheep cheese              | UNICA B40 | <ul style="list-style-type: none"> <li>6.5% NaCl +</li> <li><i>B</i>-galactosidase +</li> <li>Nisin A producer</li> </ul> | <ul style="list-style-type: none"> <li>Antimicrobial activity</li> <li>Antilisterial activity in vitro</li> </ul> | Cosentino et al., 2012 [37]<br>Pisano et al., 2015 [43]<br>Siroli et al., 2019 [44]<br>Bukvicki et al., 2020 [45] |

|                                   |                   |            |                                                                                                                                 |                                                                                                                       |                                                                                                                   |
|-----------------------------------|-------------------|------------|---------------------------------------------------------------------------------------------------------------------------------|-----------------------------------------------------------------------------------------------------------------------|-------------------------------------------------------------------------------------------------------------------|
| <i>L. lactis</i><br>6LS5          | Raw sheep milk    | UNICA B46  | <ul style="list-style-type: none"> <li>• 6.5% NaCl +</li> <li>• <i>B</i>-galactosidase +</li> <li>• Nisin Z producer</li> </ul> | <ul style="list-style-type: none"> <li>• Antimicrobial activity</li> <li>• Antilisterial activity in vitro</li> </ul> | Cosentino et al., 2012 [37]<br>Pisano et al., 2015 [43]<br>Siroli et al., 2019 [44]<br>Bukvicki et al., 2020 [45] |
| <i>L. lactis</i><br>1FS171M       | Sheep cheese      | UNICA B108 | <ul style="list-style-type: none"> <li>• Milk coagulation +</li> <li>• 6.5% NaCl +</li> </ul>                                   | <ul style="list-style-type: none"> <li>• Antimicrobial activity</li> </ul>                                            | Cosentino et al., 2002 [46]<br>Master thesis (unpublished)                                                        |
| <i>L. lactis</i><br>2A/SB         | Sheep cheese whey | UNICA B56  | <ul style="list-style-type: none"> <li>• Milk coagulation +</li> </ul>                                                          | <ul style="list-style-type: none"> <li>• Antimicrobial activity</li> </ul>                                            | Cosentino et al., 2002 [46]<br>Master thesis (unpublished)                                                        |
| <i>L. lactis</i><br>9/20234       | Raw sheep milk    | UNICA B47  | <ul style="list-style-type: none"> <li>• 6.5% NaCl +</li> <li>• <i>B</i>-galactosidase +</li> <li>• Nisin A producer</li> </ul> | <ul style="list-style-type: none"> <li>• Antimicrobial activity</li> <li>• Antilisterial activity in vitro</li> </ul> | Cosentino et al., 2012 [37]<br>Pisano et al., 2015 [43]<br>Siroli et al., 2019 [44]<br>Bukvicki et al., 2020 [45] |
| <i>Lpb. plantarum</i><br>62LP39b  | Raw sheep milk    | UNICA B28  | <ul style="list-style-type: none"> <li>• Milk coagulation +</li> </ul>                                                          | <ul style="list-style-type: none"> <li>• Antibacterial activity</li> <li>• Antifungal activity</li> </ul>             | Pisano et al., 2008 [47]<br>( <i>L. plantarum</i> DBS273 renamed as <i>L. plantarum</i> 62LP39B)                  |
| <i>Lpb. plantarum</i><br>11/20966 | Raw sheep milk    | UNICA B26  | <ul style="list-style-type: none"> <li>• Milk coagulation +</li> <li>• <i>B</i>-galactosidase +</li> </ul>                      | <ul style="list-style-type: none"> <li>• Antibacterial activity</li> <li>• Antifungal activity</li> </ul>             | Cosentino et al., 2002 [46]<br>Pisano et al., 2014 [39]<br>Cosentino et al., 2018 [3]                             |
| <i>Lpb. plantarum</i><br>4A/20045 | Raw sheep milk    | UNICA B29  | <ul style="list-style-type: none"> <li>• Milk coagulation +</li> </ul>                                                          | <ul style="list-style-type: none"> <li>• Antifungal activity</li> </ul>                                               | Cosentino et al., 2002 [46]<br>Cosentino et al., 2018 [3]                                                         |
| <i>Lpb. plantarum</i><br>19/20711 | Raw sheep milk    | UNICA B25  | <ul style="list-style-type: none"> <li>• Milk coagulation +</li> <li>• <i>B</i>-galactosidase +</li> </ul>                      | <ul style="list-style-type: none"> <li>• Antibacterial activity</li> <li>• Antifungal activity</li> </ul>             | Cosentino et al., 2002 [46]<br>Pisano et al., 2014 [39]<br>Cosentino et al., 2018 [3]                             |
| <i>Lpb. plantarum</i><br>1B3M     | Sheep cheese      | UNICA B30  | <ul style="list-style-type: none"> <li>• Milk coagulation +</li> </ul>                                                          | <ul style="list-style-type: none"> <li>• Antifungal activity</li> </ul>                                               | Cosentino et al., 2002 [46]<br>Cosentino et al., 2018 [3]                                                         |
| <i>Lpb. plantarum</i><br>4/16898  | Raw sheep milk    | UNICA B27  | <ul style="list-style-type: none"> <li>• Milk coagulation +</li> <li>• <i>B</i>-galactosidase +</li> </ul>                      | <ul style="list-style-type: none"> <li>• Antibacterial activity</li> <li>• Antifungal activity</li> </ul>             | Cosentino et al., 2002 [46]<br>Pisano et al., 2014 [39]<br>Cosentino et al., 2018 [3]                             |
| <i>Lpb. plantarum</i><br>1/14537  | Raw sheep milk    | UNICA B32  | <ul style="list-style-type: none"> <li>• Milk coagulation +</li> </ul>                                                          | <ul style="list-style-type: none"> <li>• Antifungal activity</li> </ul>                                               | Cosentino et al., 2002 [46]<br>Cosentino et al., 2018 [3]                                                         |

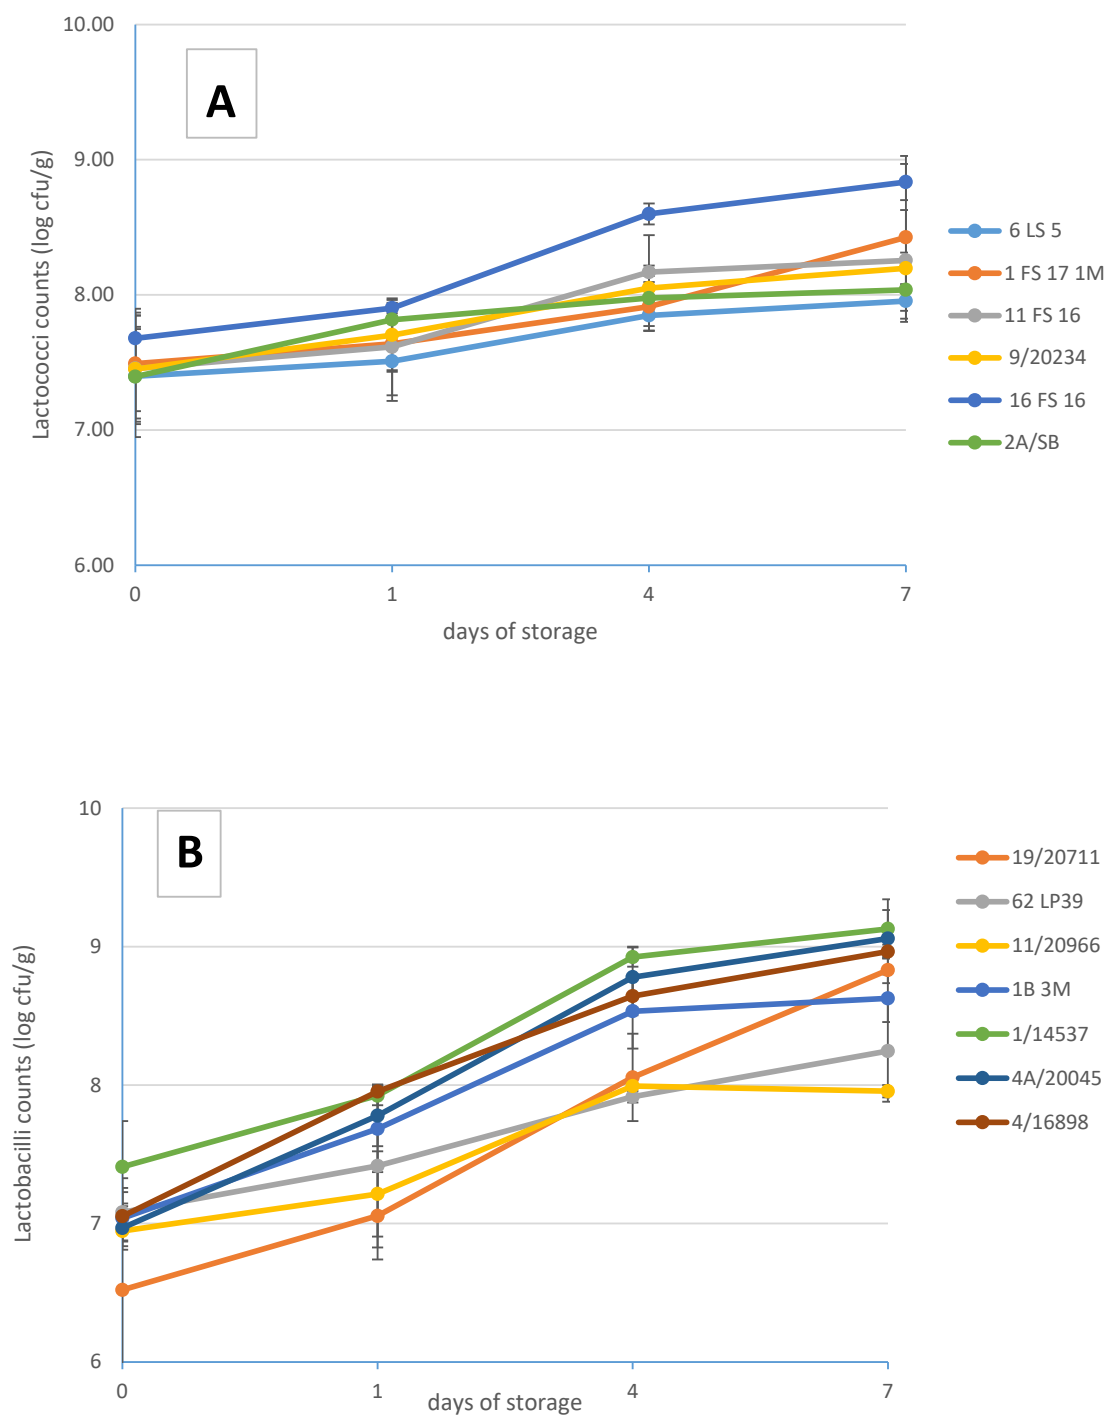

**Figure S2.** Evolution of Lactococci (**A**) or Lactobacilli (**B**) counts in experimental cheeses during storage (0, 1, 4, 7 days) at 10°C (means  $\pm$  SD of two sample)
